# Supplementary material for: Thermoelectrochemical cells based on Li+/Li redox couples in LiFSI glyme electrolytes
Source: Royal Society of Chemistry journal article supplement (doi:10.1039/c8cp03155j), 2018-01-01
Supplement: c8cp03155j1.pdf [file c8cp03155j1.pdf]

## Supporting Information

# **Thermoelectrochemical cells based on Li<sup>+</sup>/Li redox couples in LiFSI glyme electrolytes**

**Kyunggu Kim and Hochun Lee\***

Department of Energy Science and Engineering, DGIST, Daegu 42988, Republic of Korea

\*Corresponding author:

Tel: +82-53-785-6411

Fax: +82-53-785-6409

E-mail: [dukelee@dgist.ac.kr](mailto:dukelee@dgist.ac.kr)

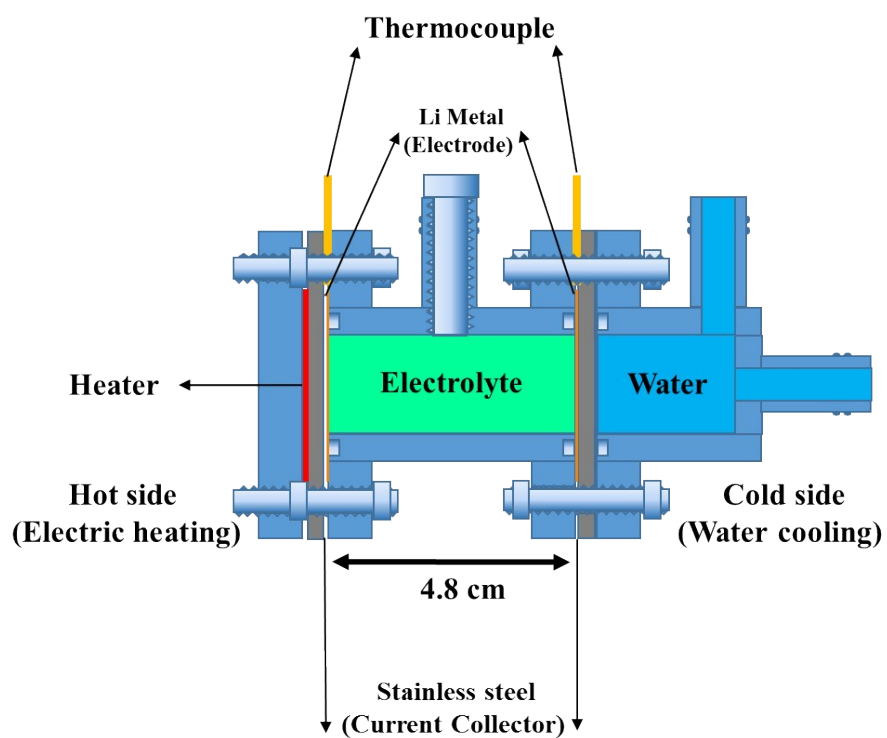

Figure S1. Schematic of the TEC cells with heating and cooling systems. The electrode area is  $3.14 \text{ cm}^2$ , and the distance of the two electrodes is 4.8 cm.

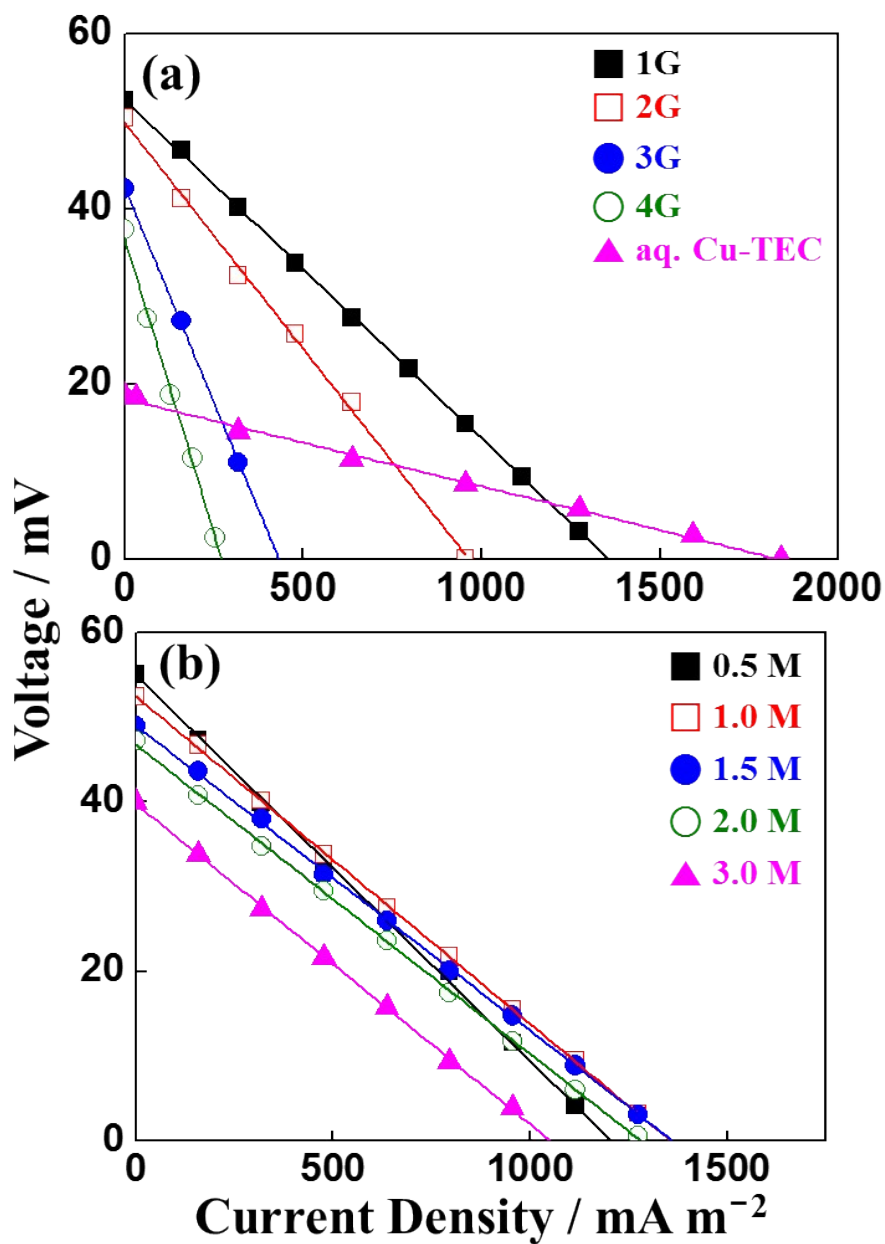

Figure S2. (a) Voltage vs. current density of Li-TECs using a series glyme solutions (1G–4G) of 1.0 M LiFSI salt for  $T_{\text{cold}}$  of 25 °C and  $T_{\text{hot}}$  of 50 °C, and (b) voltage vs. current density of Li-TECs with 1G electrolytes of 0.5–3.0 M LiFSI.

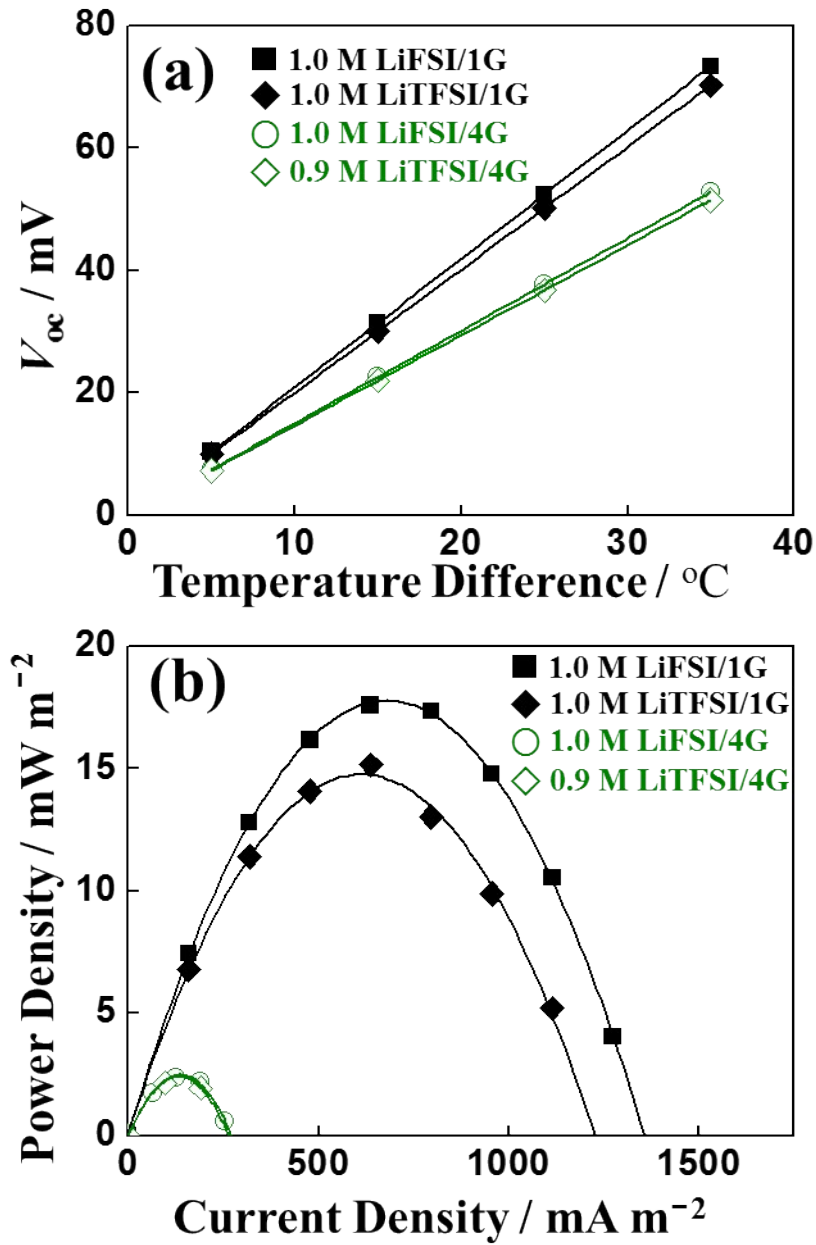

Figure S3. (a)  $V_{oc}$  changes vs. temperature difference of Li-TECs with LiFSI or LiTFSI and 1G or 4G electrolytes.  $T_{hot}$  was varied over 30–60  $^{\circ}\text{C}$  and  $T_{cold}$  was fixed at 25  $^{\circ}\text{C}$  (b) Power density vs. current density of Li-TECs for  $T_{cold}$  of 25  $^{\circ}\text{C}$  and  $T_{hot}$  of 50  $^{\circ}\text{C}$ .

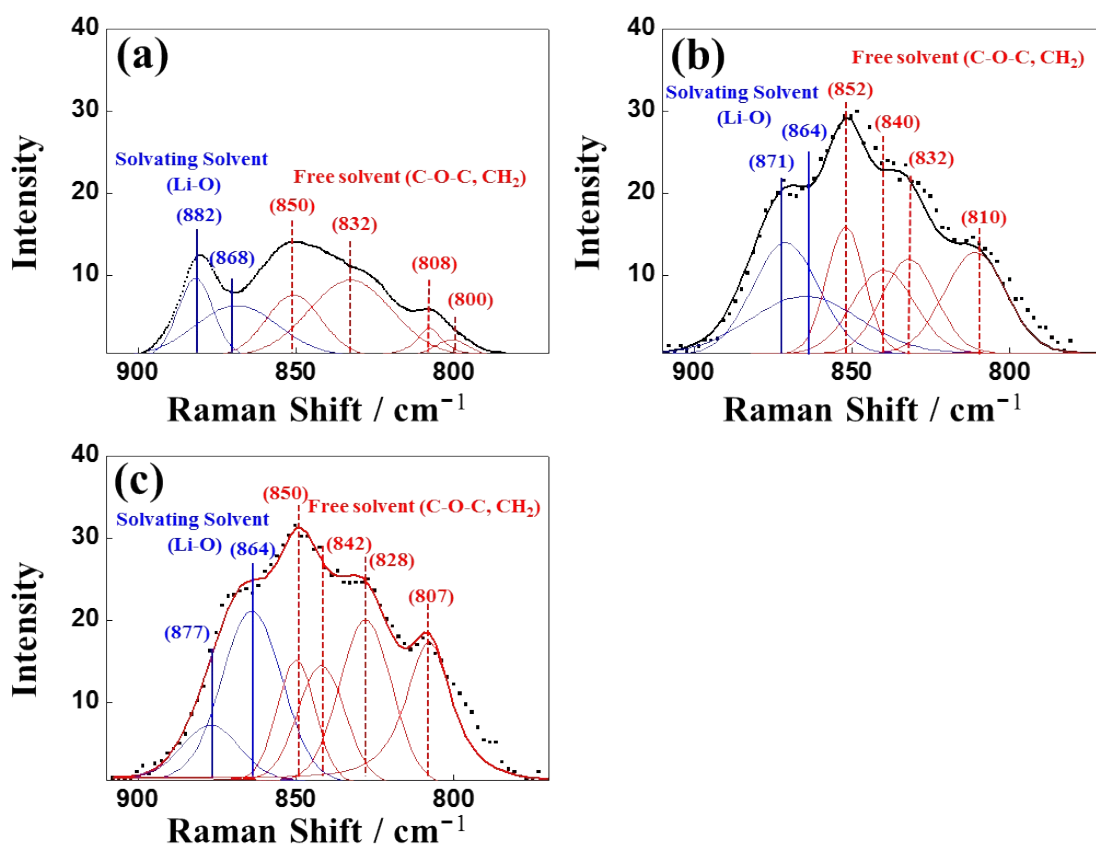

Figure S4. Raman spectra of (a) 2G, (b) 3G, and (c) 4G electrolytes of 1.0 M LiFSI

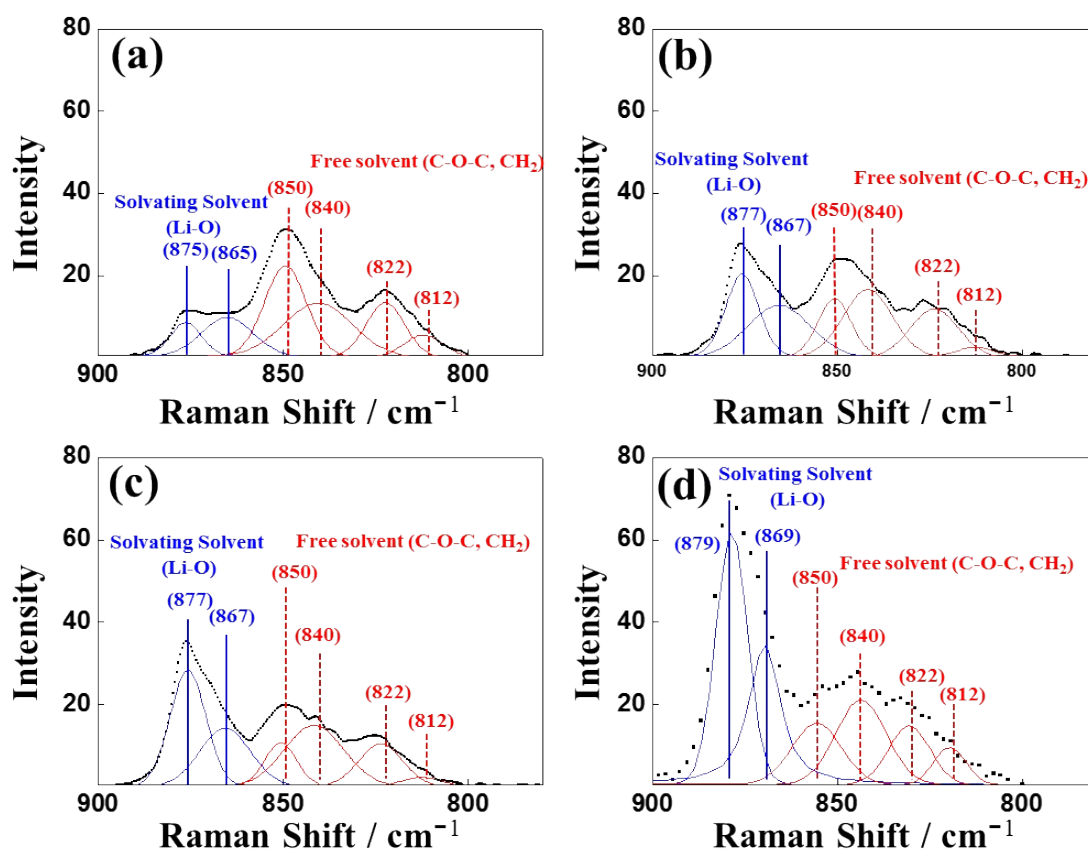

Figure S5. Raman spectra of LiFSI 1G electrolytes of (a) 0.5 M, (b) 1.5 M, (c) 2.0 M, and (d) 3.0 M.

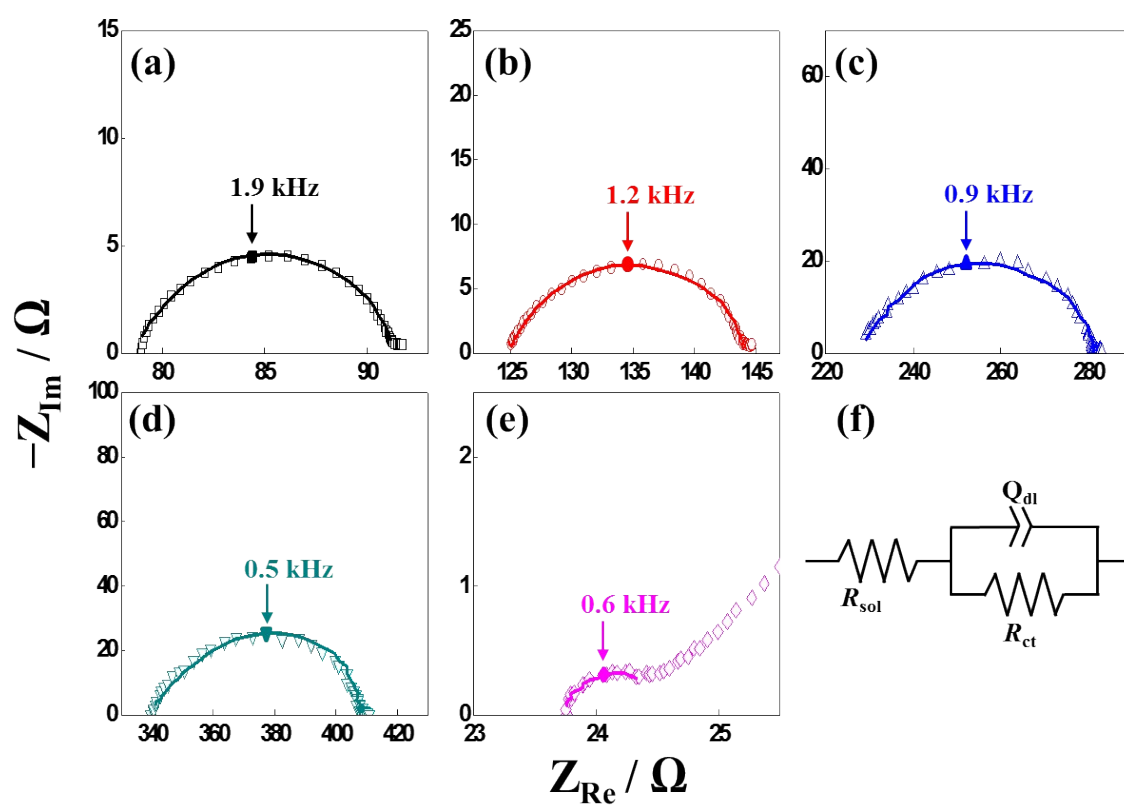

Figure. S6 Electrochemical impedance spectra of Li-TECs with 1.0 M LiFSI (a) 1G, (b) 2G, (c) 3G, (d) 4G, and a Cu-TEC with (e) 0.7 M  $\text{CuSO}_4$  + 0.1 M  $\text{H}_2\text{SO}_4$  aqueous electrolyte. (f) Equivalent circuit employed for the fitting of impedance results. The experimental spectra are denoted with circles and the best-fitted results are indicated by solid lines.

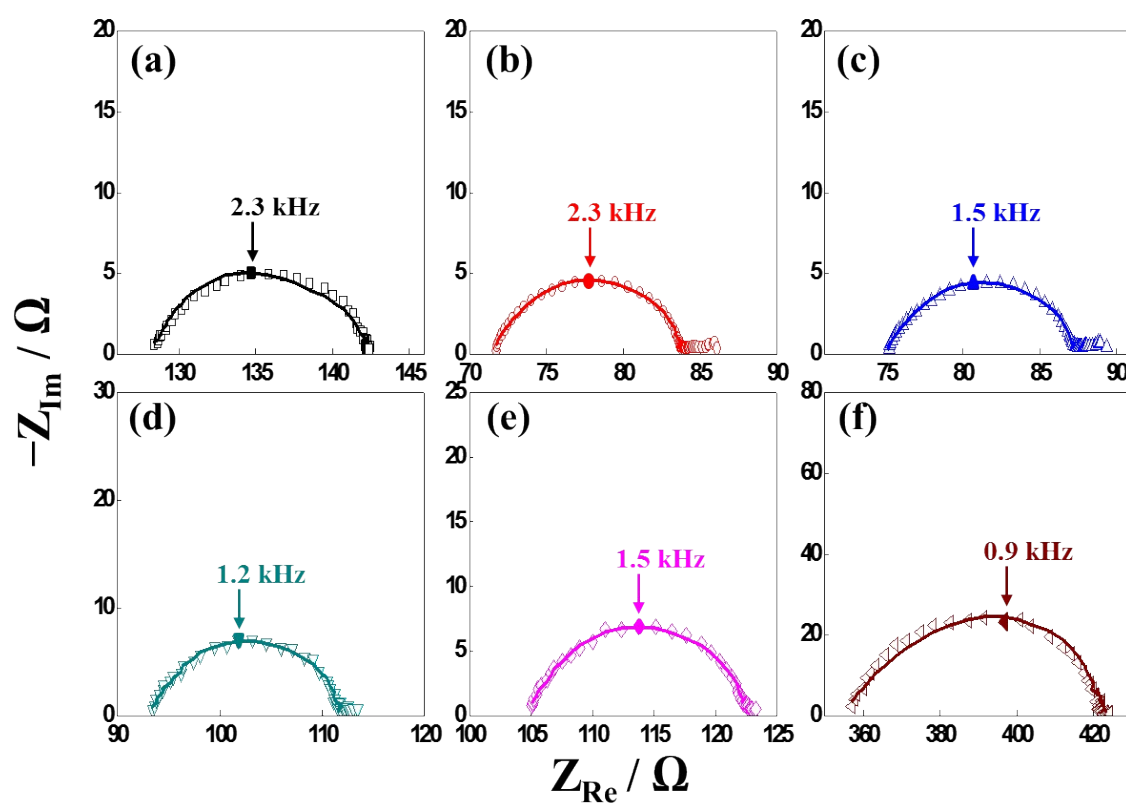

Figure. S7 Electrochemical impedance spectra of Li-TECs with (a) 0.5 M, (b) 1.5 M, (c) 2.0 M, and (d) 3.0 M LiFSI 1G electrolytes, and (e) 1.0 M LiTFSI 1G and (f) 1.0 M LiTFSI 4G electrolytes. The experimental spectra are denoted with circles and the best-fitted results are indicated by solid lines.
